# Supplementary material for: Night-time versus daytime surgical outcomes in chronic subdural hematomas: a post hoc analysis of the FINISH randomized trial
Source: PubMed Central journal article supplement (PMC11496360; doi:10.1007/s00701-024-06302-9), 2024-10-22
Supplement: 701_2024_6302_MOESM1_ESM.pdf [file 701_2024_6302_MOESM1_ESM.pdf]

eTable 1. Adverse events within six months for patient having surgery during daytime and night-time

| Characteristic                                               | Daytime surgery<br>(n=490) | Nigh-time surgery<br>(n=99) |
|--------------------------------------------------------------|----------------------------|-----------------------------|
| Severe adverse events, no. (%)                               | 94 (19.1%)                 | 12 (12.1%)                  |
| Cardiac arrhythmia                                           | 2 (0.4%)                   | 2 (2.0%)                    |
| Epileptic seizure                                            | 12 (2.5%)                  | 2 (2.0%)                    |
| Gastrointestinal disorder*                                   | 6 (1.2%)                   | 1 (1.0%)                    |
| Infection (systemic, requiring iv antibiotics)               | 43 (8.8%)                  | 5 (5.1%)                    |
| Intracranial hemorrhage†                                     | 19 (3.9%)                  | 1 (1.0%)                    |
| Intracranial ischemia                                        | 11 (2.3%)                  | 1 (1.0%)                    |
| Myocardial infarction                                        | 1 (0.2%)                   | 0 (0%)                      |
| New trauma (injury requiring hospitalization)                | 12 (2.5%)                  | 0 (0%)                      |
| Other medical event requiring hospitalization ‡              | 6 (1.2%)                   | 0 (0%)                      |
| Pulmonary embolism (or DVT causing PE)                       | 8 (1.6%)                   | 0 (0%)                      |
| Tension pneumocephalus                                       | 3 (0.6%)                   | 1 (1.0%)                    |
| Minor adverse events, no. (%)                                | 83 (16.9%)                 | 14 (14.1%)                  |
| Cardiac arrhythmia                                           | 0 (0%)                     | 1 (1.0%)                    |
| Infection (non-systemic, not prolonging hospitalization)     | 63 (13.0%)                 | 12 (12.1%)                  |
| Local other wound problem                                    | 2 (0.4%)                   | 0 (0%)                      |
| New trauma (not prolonging hospitalization)                  | 14 (2.9%)                  | 0 (0%)                      |
| Normal pressure hydrocephalus                                | 4 (0.8%)                   | 1 (1.0%)                    |
| Other medical event not requiring hospitalization or surgery | 11 (2.3%)                  | 1 (1.0%)                    |
| Skin disorder or rash                                        | 4 (0.8%)                   | 0 (0%)                      |
| Thrombophlebitis, DVT not causing pe or chronic PE           | 5 (1.0%)                   | 1 (1.0%)                    |
| Transient postoperative hemiparesis                          | 1 (0.2%)                   | 0 (0%)                      |
| Procedure-related adverse events, no. (%)                    | 38 (7.8%)                  | 2 (2.0%)                    |
| Acute subdural hematoma                                      | 3 (0.6%)                   | 0 (0%)                      |
| Cerebral infarction                                          | 8 (1.6%)                   | 0 (0%)                      |
| Critical limb ischemia                                       | 1 (0.2%)                   | 0 (0%)                      |
| Deep venous thrombosis requiring hospitalization             | 2 (0.4%)                   | 0 (0%)                      |
| Epileptic seizure                                            | 11 (2.3%)                  | 1 (1.0%)                    |
| Intracerebral hemorrhage                                     | 1 (0.2%)                   | 0 (0%)                      |
| Intracranial empyema                                         | 1 (0.2%)                   | 0 (0%)                      |
| Mesenteric ischemia                                          | 2 (0.4%)                   | 0 (0%)                      |
| Pulmonary embolism                                           | 1 (0.2%)                   | 0 (0%)                      |
| Subarachnoid hemorrhage                                      | 1 (0.2%)                   | 0 (0%)                      |
| Tension pneumocephalus                                       | 3 (0.6%)                   | 1 (1.0%)                    |
| Problem with drain removal                                   | 1 (0.2%)                   | 0 (0%)                      |
| Wound infection                                              | 2 (0.4%)                   | 0 (0%)                      |

One patient can have zero or several adverse events.

\*bowel perforation, mesenteric ischemia, cholecystitis

†acute subdural hematoma, spontaneous or traumatic intracerebral hemorrhage, traumatic subarachnoid hemorrhage, growth of contralateral chronic subdural hematoma, new contralateral chronic subdural hematoma

‡ cardiac insufficiency, critical limb ischemia, transient ischemic attack

Abbreviations: DVT=deep venous thrombosis, PE=pulmonary embolism
